# Supplementary material for: Immunosuppressive effect of hispidulin in allergic contact dermatitis
Source: Springer Nature journal article supplement (doi:10.1186/s12906-019-2689-z), 2019-10-15

**Additional file 1.** Measurement of dermis thickness. Dermis thickness, excluding cartilage and epidermis, was measured by using photomicrographs of ears at 48-hours post-challenge. All values are presented as mean  $\pm$  standard deviation (n=5; \* $p < 0.05$ , \*\*\* $p < 0.001$ ).

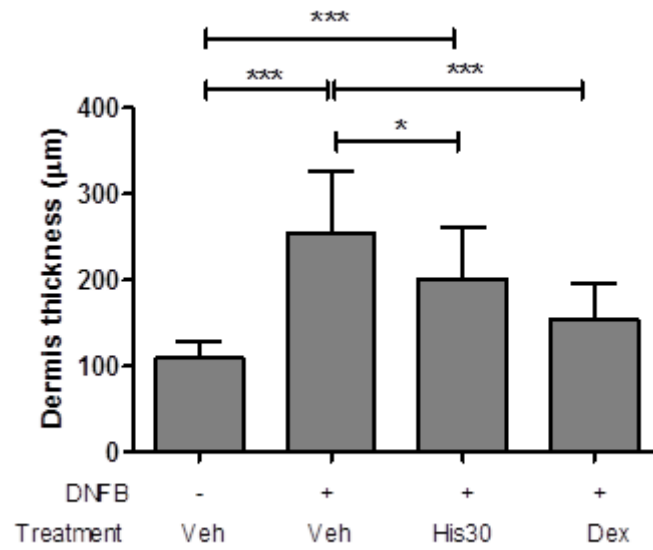

Supplement: MOESM1 [file 17274998]
